# Supplementary material for: Voltammetric determination of diffusion coefficients in polymer membranes
Source: Royal Society of Chemistry journal article supplement (doi:10.1039/c6an02671k), 2017-01-01
Supplement: c6an02671k1.pdf [file c6an02671k1.pdf]

Supporting information for publication

VOLTAMMETRIC DETERMINATION OF DIFFUSION AND PARTITION COEFFICIENTS IN  
PLASTICIZED POLYMER MEMBRANES

James B. Sheppard, Bradley Hambly, Bradford Pendley, Erno Lindner\*

Department of Biomedical Engineering, University of Memphis, Memphis, TN 38152

---

\* Corresponding author, Phone: (901) 678-5641. Fax: (901) 678-5281. email: [elindner@memphis.edu](mailto:elindner@memphis.edu)

Table-S1. Compilation of diffusion coefficients of ferrocene ( $D_{Fc}$ ) and ferrocene methanol ( $D_{FcMeOH}$ ) measured by voltammetry in various solvents in the presence of supporting electrolytes, and calculated by the Stokes-Einstein relationship, or published in the literature. (COV: coefficient of variation, N: number of measurements)

| <u>Solvent</u> | <b>Measured</b>          |    |         | <b>Stokes-Einstein<sup>o</sup></b> |                       |          | <b>Published</b>                                                                                                                                                                           |
|----------------|--------------------------|----|---------|------------------------------------|-----------------------|----------|--------------------------------------------------------------------------------------------------------------------------------------------------------------------------------------------|
|                | $D$ (cm <sup>2</sup> /s) | N  | COV (%) | $D$ (cm <sup>2</sup> /s)           |                       | slip (%) |                                                                                                                                                                                            |
|                |                          |    |         | no-slip                            | full-slip             |          |                                                                                                                                                                                            |
| Water          | $7.5 \times 10^{-6}$     | 19 | 2       | $7.4 \times 10^{-6}$               | $1.11 \times 10^{-5}$ | 4        | $D_{FcMeOH} 7.6 \times 10^{-6}$ <sup>1</sup><br>$D_{FcMeOH} 7 \times 10^{-6}$ <sup>2</sup><br>$D_{FcMeOH} 6.1 \times 10^{-6}$ <sup>3</sup><br>$D_{FcMeOH} 7.8 \times 10^{-6}$ <sup>4</sup> |
| Methanol       | $1.2 \times 10^{-5}$     | 5  | 5       | $1.22 \times 10^{-5}$              | $1.83 \times 10^{-5}$ | 0        |                                                                                                                                                                                            |
| Acetone        | $2.10 \times 10^{-5}$    | 5  | 2       | $2.12 \times 10^{-5}$              | $3.18 \times 10^{-5}$ | 0        | $D_{Fc} 2.40 \times 10^{-5}$ =<br>$D_{Fc} 2.76 \times 10^{-5}$ $\Gamma$                                                                                                                    |
| Acetonitrile   | $1.97 \times 10^{-5}$    | 6  | 1       | $1.78 \times 10^{-5}$              | $2.67 \times 10^{-5}$ | 22       | $D_{Fc} 1.74 \times 10^{-5}$ =<br>$D_{Fc} 2.17 \times 10^{-5}$ $\Gamma$                                                                                                                    |
| DCM            | $1.76 \times 10^{-5}$    | 9  | 4       | $1.59 \times 10^{-5}$              | $2.39 \times 10^{-5}$ | 21       | $D_{Fc} 1.12 \times 10^{-5}$ =<br>$D_{Fc} 1.67 \times 10^{-5}$ $\Gamma$                                                                                                                    |
| THF            | $1.61 \times 10^{-5}$    | 8  | 1       | $1.43 \times 10^{-5}$              | $2.14 \times 10^{-5}$ | 26       |                                                                                                                                                                                            |
| Octanol        | $1.2 \times 10^{-6}$     | 5  | 4       | $9 \times 10^{-7}$                 | $1.3 \times 10^{-6}$  | 75       |                                                                                                                                                                                            |
| DOS            | $5.0 \times 10^{-7}$     | 5  | 5       | $4 \times 10^{-7}$                 | $6 \times 10^{-7}$    | 65       |                                                                                                                                                                                            |
| oNPOE          | $6.0 \times 10^{-7}$     | 10 | 5       | $5 \times 10^{-7}$                 | $7 \times 10^{-7}$    | 65       |                                                                                                                                                                                            |

<sup>o</sup> The calculated values correspond to no-slip (Slip = 0%) and full slip (Slip = 100%) conditions. The data in the column labeled as slip (%) are estimated percent slip values between analyte molecules and the solvent

= 273.15 °K

$\Gamma$  298.15 °K

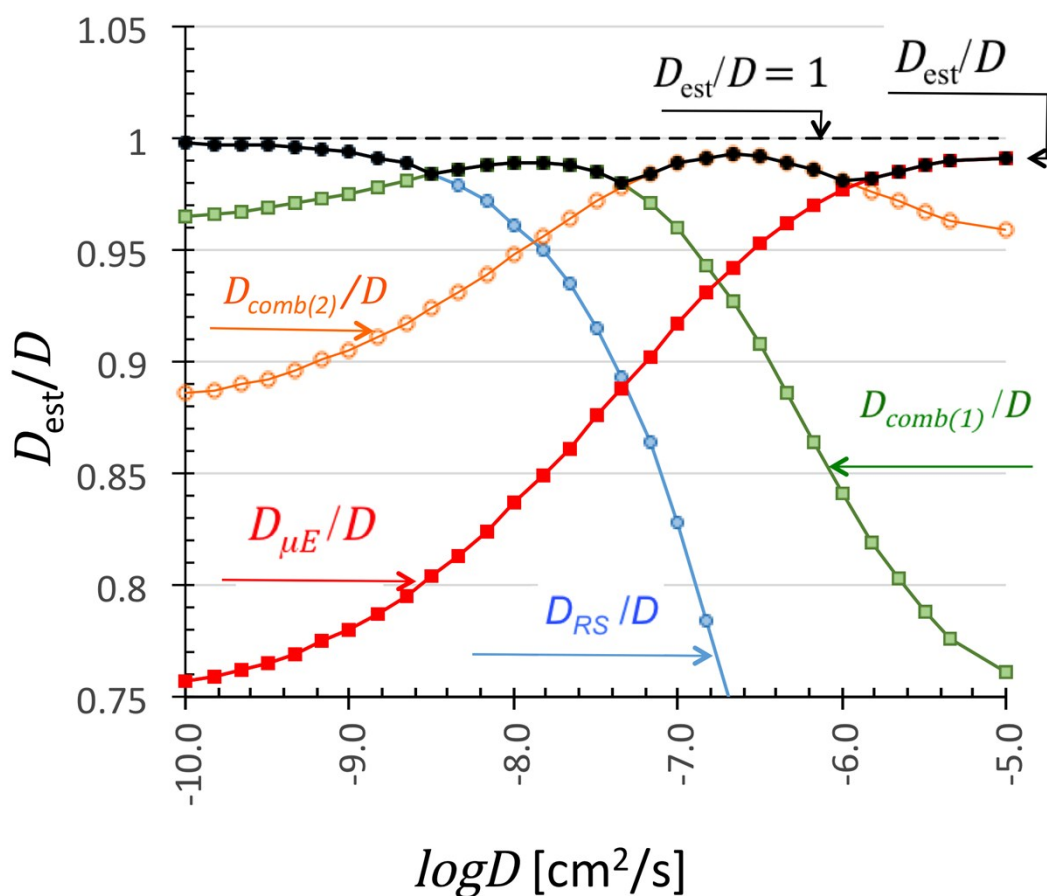

Figure

e S1: Ratios of the estimated diffusion coefficients to the true diffusion coefficient ( $D_{est}/D$ ) and the largest of the four estimates ( $\bullet$ ).  $D_{RS}$  and  $D_{\mu E}$  were determined from the slopes (Eq. 5) and intercepts (Eq.6) of  $i_p(i_L)$  vs.  $v^{1/2}$  plots constructed from simulated LSVs using  $D$  as diffusion coefficient, and  $D_{comb(1)}$  and  $D_{comb(2)}$  were calculated by Equations 7 and 8 in the main article, respectively. The horizontal dotted line at  $D_{est}/D = 1$  represents perfect agreement between the estimated and the true diffusion coefficient.

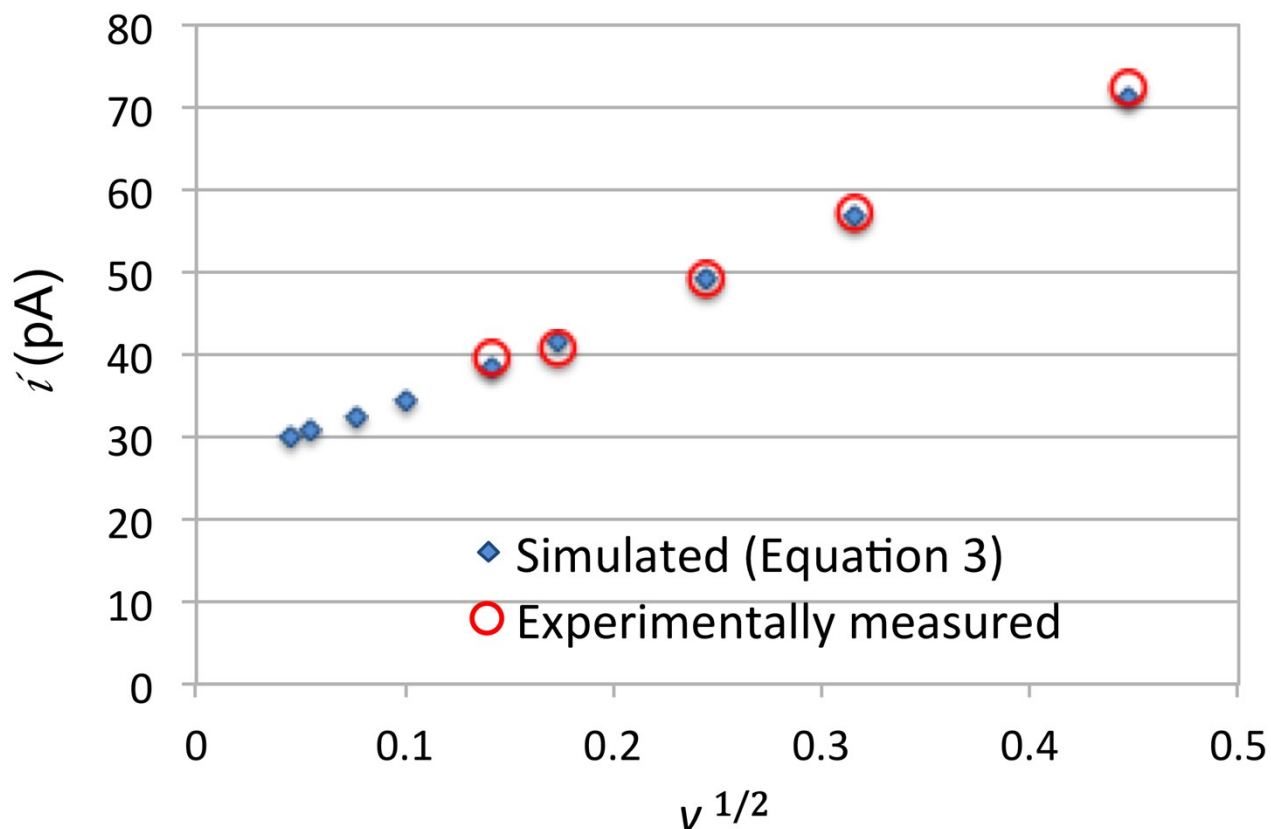

Figure S2: Demonstration of the agreement between  $i_p(i_L)$  vs.  $v^{1/2}$  plots measured experimentally and constructed from simulated LSVs. The experimental data points were collected by recording CVs of FcCOOH with the PEC in an oNPOE plasticized PVC membrane with 32% PVC content and 2.0 mM FcCOOH concentration.

#### REFERENCES

1. C. Amatore, N. Da Mota, C. Lemmer, C. Pebay, C. Sella and L. Thouin, *Anal. Chem.*, 2008, 80, 9483-9490.
2. C. Cannes, F. Kanoufi and A. J. Bard, *J. Electroanal. Chem.*, 2003, 547, 83-91
3. P. Liljeroth, C. Johans, C. J. Slevin, B. M. Quinn and K. Kontturi, *Electrochemistry Communications*, 2002, 4, 67-71.
4. W. J. Miao, Z. F. Ding and A. J. Bard, *J. Phys. Chem. B*, 2002, 106, 1392-1398.
